# Supplementary material for: Application of a new productivity coupling hydrothermal factors (PCH)model for evaluating net primary productivity of grassland in SouthernChina
Source: Copernicus journal article supplement (doi:10.5194/se-2016-148), 2016-11-08
Supplement: Supplementary file [file se-2016-148-AC2-supplement.pdf]

1 Application of a new productivity coupling hydrothermal factors (PCH)  
2 model for evaluating net primary productivity of grassland in Southern  
3 China

4  
5 Zheng-Guo Sun<sup>a\*</sup> · Jie Liu<sup>b</sup> · Hai-Yang Tang<sup>a</sup>  
6

7 <sup>a</sup>College of Agro-grassland Science, Nanjing Agricultural University, 1 Weigang, Nanjing, Jiangsu 210095, People's  
8 Republic of China

9 <sup>b</sup>Department of Environmental Science, Hokkaido University, Sapporo 060-0810, Japan

10 \*Corresponding author e-mail address: sunzg@njau.edu.cn (Z.G. Sun)

11 **ABSTRACT**

12 Grassland ecosystems play important roles in the global carbon cycle. The net primary productivity (NPP) of  
13 grassland ecosystems has become the hot spot of terrestrial ecosystems. To simulate grassland NPP in Southern  
14 China, a new productivity coupling hydrothermal factors (PCH) model was built and validated based on data  
15 recorded from 2003 to 2014. The results show a logarithmic correlation between grassland NPP and mean annual  
16 temperature and a linear positive correlation between grassland NPP and mean annual precipitation in Southern  
17 China, both highly significant relationships. There was a highly significant correlation between simulated and  
18 measured NPP ( $R^2 = 0.8027$ ). Both RMSE and RRMSE were relatively low, showing that the simulation results of  
19 the model were reliable. The NPP values in the study area had a decreasing trend from east to west and south to  
20 north. Mean NPP was  $471.62 \text{ g C m}^{-2}$  from 2003 to 2014. Additionally, the mean annual NPP of Southern  
21 grassland presented a rising trend increasing  $3.49 \text{ g C m}^{-2} \text{ yr}^{-1}$  during the past 12 years. These results document  
22 performance and use of a new method to estimate the grassland NPP in Southern China.

23 **KEY-WORDS:** grassland NPP, PCH model, mean annual precipitation, mean annual temperature, Southern  
24 China

25

## 26 **1 Introduction**

27 Grassland is one of the major biological communities in the world. It covers more than 40% of the total land area  
28 on the planet, and plays an important role in the global biogeochemical cycle and energy transformation process  
29 (Chen and Zhang, 2000; Mosier et al., 1991). Meanwhile, grassland has also the functions of water and soil  
30 conservation, windbreak and sand-fixation, biodiversity maintenance, shaping soil from surface to depth, with  
31 close connection with human survival and development (Brevik et al., 2015). The roots system of grassland  
32 vegetation occurs in soil, so the direct link between soil and vegetation can be discovered. Most of soil functions  
33 have strong ties to vegetation, such as biomass production, biodiversity pool and Storing, filtering and  
34 transforming nutrient, substances and water (Keesstra et al., 2016). In soil – grassland vegetation – atmosphere  
35 continuum, grassland acts as the center of ecological functions on the ecosystem scale. The impacts of the climate  
36 on grasslands are quite complicated. On one hand, different types of grasslands have their own spatial  
37 distributions controlled by temperature and precipitation; on the other hand, a rise in temperature will alter some  
38 processes in the ecosystem (such as evapotranspiration, decomposition and photosynthesis). Therefore,  
39 temperature exerts a significant effect on biological community productivity (Douglas and Geoffrey, 1997). Net  
40 Primary Productivity (NPP) is an indicator that measures the production capacity and economically and socially  
41 significant products of the plant community under natural conditions (Sun et al., 2013). Changes in NPP directly  
42 reflect the response of ecosystems to climatic conditions, therefore it can be used as a research index in the  
43 relationship between ecosystem function and climate change (Zhou et al., 2014). It also has an important  
44 theoretical and practical significance for evaluating the environmental quality of terrestrial ecosystems, regulating  
45 ecological processes and estimating the terrestrial carbon sink to master the inter-annual variation rule of  
46 terrestrial NPP (Cao, 2013; Richardson et al., 2012; Picard et al., 2005; Zhang et al., 2011; Xu et al., 2012).

47 Estimation methods, most based on models, to calculate grassland NPP were discussed in previous research  
48 (Gill et al., 2002). Models demonstrate advantages over other methods in global, regional and other large scales

49 studies, becoming an important tool in macro ecological research of grasslands. Grassland NPP estimation models  
50 have been used by some researchers for dynamic monitoring and forecasting (Raich et al., 1991; Matsushita and  
51 Tamura 2002) providing theoretical and technical support for ecological improvement and recovery of grasslands  
52 (Christenson et al., 2014). A large number of studies were conducted by domestic and foreign scholars to  
53 understand the influences brought by climate change to the ecosystem processes, including grassland productivity  
54 and grassland C circulation. Although many researchers have studied the influences on a national or regional scale  
55 (Parton et al., 1995; Hall et al., 1995; Braswell et al., 1997; Cao and Woodward, 1998; Fang et al., 2001; Ni, 2002;  
56 Mantgem and Stephenson, 2007; Wunder et al., 2013; Gang et al., 2015), there has been little research on  
57 relationships between grassland NPP and climate factors in Southern China. Grassland resources are abundant in  
58 China, with an area of nearly 400 million ha, nearly 1/6 of that in Southern China. As the grassland in northern  
59 areas are continues to deteriorate and desertize, the ecological system of grassy hills and slopes in Southern China  
60 are becoming increasingly important. Study of the relationship between NPP and climatic factors, together with  
61 their dynamic simulation will provide insights on the effective management and reasonable utilization of  
62 grasslands in Southern China, and the promotion of global change research. Our objectives were the following:  
63 (1) to build an ecological model (PCH) based on the statistical analysis of the relationship between measured NPP,  
64 precipitation and temperature; (2) to modify the adjustment coefficient and the parameter of the model based on  
65 the grassland types and their ecological characteristics; (3) to simulate NPP using the PCH model and analyze its  
66 changing trends on the spatial and temporal pattern from 2003 to 2014; (4) to verify the accuracy of the PCH  
67 model by comparing it with field observation data; (5) to explore the dominant hydrothermal factor for  
68 determining the NPP change of the study area.

## 69 **2 MATERIALS AND METHODS**

### 70 **2.1 Study area**

71 The grassy hills and slopes of Southern China, centered on 110°0'E, 27°30'N, was the focus of research. The site

72 encompassed 17 provinces and an area of about 60 million ha (Figure 1). The grasslands of Southern China are  
73 mainly composed of typical grassland, wetland grassland, lowland meadow and upland meadow. The Southern  
74 grasslands are scattered and distributed among areas of forest land and cultivated land, and mostly located on  
75 slopes. Most regions of Southern grasslands are managed with grazing and some regions with enclosure and  
76 cutting. The climate characteristics in this area include hot and rainy summer, and mild and rainy in winter, with  
77 the frost-free period being more than 300 days per year. The annual mean precipitation is between 800–1600 mm  
78 and the annual mean temperature is greater than 15 °C. These climate conditions contribute to a suitable  
79 environment for grassland.

## 80 **2.2 Data acquirement and processing**

81 NPP data acquirement: in July of 2011, 2012 and 2013, 66 sample plots were investigated in several provinces of  
82 the study area. Large quadrats were set in each representative sample plot (10m×10m), and five small squares  
83 (1m×1m) were set on corners and in the center of large quadrats. Above-ground biomass and the latitude and  
84 longitude information were recorded in each small quadrat, with an average level calculated after sampling. Every  
85 2.2 g dry matter was converted into 1g carbon, leading to the grass NPP in each sample area, represented in the  
86 form of carbon ( $\text{g C m}^{-2}$ )(Fang et al., 2001).

87 Climate data acquirement: temperature and precipitation data from year 2003 to 2014 were acquired from the  
88 ground stations of China Meteorological data sharing service system (<http://cdc.cma.gov.cn/>) (Figure 1). Kriging  
89 interpolation from Geographic information system (GIS) interpolation tool was utilized to analyze meteorological  
90 data according to the latitude and longitude information of each station. Then the image projection transformation  
91 converted data into a raster image with a latitude and longitude network and 1000 m resolution. Finally,  
92 temperature and precipitation information was extracted according to latitude and longitude corresponding to the  
93 investigation points.

94 The distribution map of grassland in the study area (Figure 2): the 1980 Chinese grassland resource inventory

95 and MOD12Q1 data acquired in 2004 were used to generate the land cover, land use map and the grassland  
96 distribution map. Open shrubs, woody savannas, savannas, grasslands and permanent wetlands were included as  
97 the grassland of Southern China based on the land use and land cover classification project proposed by the  
98 International Geosphere–Biosphere Programme (IGBP).

### 99 **2.3 Model establishment and validation**

100 Modeling methods: based on the statistical analysis of the relationship between measured NPP, precipitation and  
101 temperature, the preliminary structure of the model was developed. Then the nonlinear fitting algorithm was  
102 utilized to optimize and determine the parameters of the model.

103 Model validation: in order to verify the reliability of the simulation results, both Root Mean Square Errors  
104 (RMSE) and Relative Root-Mean-Square Errors (RRMSE) were applied to the model for testing and evaluating  
105 the simulation effects. RMSE and RRMSE were expressed as:

$$106 \quad RMSE = \sqrt{\frac{1}{n} \sum_{i=1}^n (O_i - S_i)^2} \quad (1)$$

$$107 \quad RRMSE = \sqrt{\frac{1}{n} \sum_{i=1}^n (O_i - S_i)^2 / O_a} \quad (2)$$

108 where  $O_i$  was the real value,  $S_i$  was the simulated value,  $O_a$  was the average of real value,  $n$  was the total number  
109 of samples.

## 110 **3 RESULTS**

### 111 **3.1 Relationship between grassland NPP and temperature**

112 Grassland NPP is a joint result of the regional light, temperature, precipitation, soil and other natural conditions,  
113 which reflects the ability of using natural environmental resources (Gang et al., 2015). Under natural conditions,  
114 temperature and precipitation were the two dominate influential factors to grassland NPP in Southern China (Sun  
115 *et al.*, 2014). The results of the analysis of the relationship between grassland NPP and temperature in Southern  
116 China showed that: (1) between 10 and 20 C there was a linear positive correlation between temperature and the

117 NPP, and (2) a para-curve relationship was found between from 20 °C to 30 °C. Generally, the relationship  
118 between temperature and grassland NPP was logarithmic with correlation coefficient  $r$  being 0.4629, reaching a  
119 significant level ( $P < 0.01$ ). As a result, the relationship could be presented as a logarithmic equation.

### 120 **3.2 Relationship between grassland NPP and precipitation**

121 Precipitation is a key factor in many NPP estimation models (Huston, 2012; Yu et al., 2008). Mean monthly  
122 precipitation in the grassland ecological system of Southern China presented a large range throughout a year with  
123 min precipitation being 40 mm and max being over 200 mm. NPP also showed a regular distribution according to  
124 the precipitation, with a typical linear positive correlation. The correlation coefficient  $r$  was 0.7836, reaching a  
125 very significant level ( $P < 0.01$ ). Therefore, the influences of precipitation on grassland NPP could be expressed as  
126 a linear equation.

### 127 **3.3 Estimation model of grassland NPP**

#### 128 **3.3.1 Model establishment**

129 According to the analysis results, a positive relationship existed between grassland NPP and mean annual  
130 temperature and annual precipitation in Southern China. Thus it is feasible to express the relationship with  
131 logarithmic and linear equations, respectively. However, the results varied greatly when temperature was directly  
132 used as the equation factor and any data below zero °C would fail to be processed. Thus it was necessary to  
133 introduce a temperature adjustment coefficient, described here as:

$$134 \quad T_a = \ln(T/t_1 + a_1) \quad (3)$$

135 where  $T_a$  was the temperature adjustment coefficient,  $T$  was the mean annual temperature (°C),  $t_1$  was the model  
136 parameter,  $a_1$  was a constant, it was set to 2.5 in the paper.

137 Compared with the temperature, the precipitation has the same situation. Growth stopped when moisture was  
138 below a certain level. So another adjustment coefficient was introduced and expressed as following:

$$139 \quad W_a = \sqrt{W/w_1 + a_2} \quad (4)$$

140 where  $W_a$  was the adjustment coefficient,  $W$  was the mean annual precipitation (mm),  $w_1$  was the model  
141 parameter,  $a_2$  was a constant and being set to 0.5 in the paper.

142 According to the above information, the estimation model of grassland NPP in Southern China could be  
143 written as following:

$$144 \quad NPP = T_a \times W_a \times (T + W/6) \quad (5)$$

145 The PCH model was built to simulate grassland NPP of Southern China based on the principle of grassland  
146 productivity coupling hydrothermic factors. In order to improve the applicability in the grassland of Southern  
147 China and accuracy of the simulation results, the adjustment coefficients related to temperature and precipitation  
148 were introduced into the model. Though the PCH model has not been applied to simulate the NPP of different  
149 types of vegetation, the establishment and application of the model have been based on the specific spatial  
150 distribution of grassland and complicated hydrothermal condition in Southern China. Each model has its  
151 advantages and limitations depending on different study targets and scales. The limitations of the model is that  
152 fewer influential factors were introduced into the model comparing with other ecological model. The future  
153 analysis and explication about this will be made in the discussion part of this paper. The strength of the PCH  
154 model lies in the origin of the model establishment and the focalization and directness of assessing the NPP of  
155 grassland in Southern China. The novelty of this model is mainly embodied in the process of hydrothermal  
156 assimilation in comparison to others models. Understanding controls over NPP will be crucial in developing  
157 models of these processes at larger spatial scale, so the PCH model combines the hydrothermal parameter and  
158 ecosystem process approach to quantify the carbon flow of grassland in Southern China (Gill et al., 2002).

### 159 **3.3.2 Calculation of model parameters**

160 The acquisition of model parameters was a quite complicated process, and would directly affect the accuracy of  
161 the final results. Based on the measured data from 2009 to 2010, by adopting the contraction expansion algorithm  
162 of the nonlinear fitting and MATLAB programs (Conway and Wilcox, 1970), those parameters were calculated as

163  $t_1=5.8$ ,  $w_1=560.4$ .

### 164 **3.3.3 Model validation**

165 The measured grassland NPP data from 2014 in Southern China were used to validate the simulation results. The  
166 results indicated that there was a strong and significant correlation between the simulated and measured NPP ( $R^2$   
167  $= 0.802$ ,  $P < 0.01$ ). The RMSE of the simulation was  $58.351 \text{ g C m}^{-2}$ , the RRMSE was 0.326, and both were small.  
168 All those results indicated that the simulation of precipitation and temperature model for Southern grassland NPP  
169 was feasible. The trends of the simulated and measured grassland NPP were similar (Figure 3), which also  
170 indicated that the results were reliable.

### 171 **3.4 Spatial-temporal variations of grassland NPP from the year 2003 to 2014**

172 The spatial distribution map of grassland NPP produced by the estimation model was beneficial to monitor the  
173 grassland resource. This paper built the spatial distribution map of Southern grassland NPP using the estimation  
174 model of grassland NPP based on climatic conditions (Figure 4). It showed that the minimum of mean annual NPP  
175 of Southern grassland was  $57.83 \text{ g C m}^{-2}$  and the maximum was  $1328.06 \text{ g C m}^{-2}$  in recent 12 years. The NPP of  
176 Southern grassland had an obvious zonal distribution. The NPP value was lower in northwest regions and higher  
177 in southeast and south regions, especially in Jiangxi, Guangdong and Hainan province.

178 **The variation of mean annual NPP and the relevant statistical indices of Southern grassland in the recent 12**  
179 **years were shown in Figure 5. The trend of mean annual NPP presented an increasing tendency of the whole**  
180 **Southern grassland from 2003 to 2014.** The variation range of the mean annual NPP was from 430.31 to 519.82 g  
181  $\text{C m}^{-2}$ , and the mean was  $471.62 \text{ g C m}^{-2}$ . The minimum of the mean annual NPP appeared in 2006, and the  
182 maximum value appeared in 2013. The tilt rate of the mean annual NPP of Southern grassland in recent 12 years  
183 was  $3.49 \text{ g C m}^{-2} \text{ yr}^{-1}$ , which indicated that the NPP increased about  $3.49 \text{ g C m}^{-2}$  every year ( $P < 0.05$ ).

## 184 **4 Discussion**

185 Research on the relationships between the NPP and climate factors in global or regional ecological systems started



186 in mid-1800s (Nemani et al., 2003; Zhou et al., 2014). As revealed in these studies, the vegetation index showed  
187 periodic variations with corresponding climate indices including temperature and precipitation, during the growth  
188 process of most plants. Temporal and spatial variations were quite distinct in grassland NPP, since climatic factors,  
189 especially precipitation and temperature, were factors directly linked to periodic variations (Ronnenberg and  
190 Wesche, 2010). This study showed that a temperature rise would cause a certain level rise in the grassland NPP in  
191 Southern China, especially in the high temperature zones. However, these results differed from some previous  
192 reports (Mcguire et al., 1993). In addition, there was a significant positive correlation between precipitation and  
193 NPP. When mean annual precipitation increased, grassland NPP would also increase significantly. This conclusion  
194 is consistent with previous studies (Sala et al., 2000; Knapp and Smith, 2001; Mohamed et al., 2004).

195 The ultimate goal of those studies on the relationship between climate and terrestrial ecosystem NPP is to  
196 predict the possible impacts on climate change and to take scientific countermeasures (Pablo et al., 2007), and  
197 establishing a model is an efficient means to make these predictions. Through modeling and simulation, one could  
198 reveal the quantitative change and trend of NPP caused by climate change. That was why the research of NPP  
199 model had attracted a vast amount of attention (Ren et al., 2011). This study establishes an estimation model for  
200 the grassland NPP of Southern China by using the statistical analysis of the relationship between the Southern  
201 grassland NPP and precipitation and temperature combined with biological process. The relationship between  
202 simulated and observed values reached a highly significant level. This and the low RMSE validated the reliability  
203 of the model. Therefore, it was feasible to estimate the grassland NPP in Southern China by using the PCH model  
204 described in this paper.

205 The estimation of grassland NPP is a complex process. It is not only affected by climatic factors such as  
206 precipitation and temperature, but also by the grassland vegetation's own inner physiological process, fire severity,  
207 slope position and aspect, grazing, human activities, cutting frequency and grassland ecotypes (Pereira et al., 2016;  
208 Shaw et al., 2016; Lu et al., 2015; Lin et al., 2015; Poeplau et al., 2016; [Roosendaal et al., 2016](#)).

209 **Grassy hills** and slopes in Southern China had a wide distribution with various vegetation types, therefore the  
210 NPP distribution was uneven. Although the model estimation worked well, some imperfection exists. Firstly, a  
211 classification for grass hills and slopes is needed, without of which the NPP estimation fell into a single type (Hu  
212 et al., 2016). Secondly, the NPP estimation results were representative of the entire year, while arbitrary NPP  
213 estimation for a single month has not been verified yet. Thirdly, as an important ecological parameter, MODIS  
214 normalized difference vegetation index (NDVI) needs to be added into the model (Gong et al., 2015). Then,  
215 precision of the model could be improved in the process of evaluating the changes of grassland in Southern China.  
216 Fourth, grassland soil coarseness needs to be taken into account as a result of nutrient cycling and respiration in  
217 grassland (Lü et al., 2016). The last is a sensitivity issue. The study indicated that the simulation results by the  
218 PCH Model were slightly large in a small fraction of areas with relatively low NPP, while small in a part of area  
219 with high NPP. It may be caused by the limited time span, and other factors including the influences from different  
220 types of grasslands. Hence, there might be some uncertainty to estimate the lower or higher grassland NPP using  
221 the estimation model. Further study is required to solve these problems.

## 222 **5 Conclusion**

223 In this study, a new productivity coupling hydrothermal factors (PCH) model was built to simulate the NPP in  
224 Southern China's grasslands. The PCH model is a productivity coupling hydrothermal factors model that can be  
225 expressed by the transformation of the model parameters, mean annual temperature and mean annual precipitation,  
226 which are the most critical two factors affecting the NPP of Southern China's grasslands. The results show that  
227 there is a logarithmic correlation between grassland NPP and mean annual temperature, and a linear positive  
228 correlation between grassland NPP and mean annual precipitation in Southern China. There was a very significant  
229 correlation between simulated and the measured NPP ( $R^2 = 0.8027$ ). Meanwhile, both RMSE and RRMSE stayed  
230 at a relatively low level, showing that the simulation results of the model were reliable. The NPP values in the  
231 study area had a decreasing trend from east to west and south to north respectively. The mean NPP was 471.62 g

232 C m<sup>-2</sup> from 2003 to 2014. Additionally, the mean annual NPP of Southern grassland presented a rising trend and  
233 the rate of change was 3.49 g C m<sup>-2</sup> yr<sup>-1</sup> in recent 12 years.

## 234 **6 Acknowledgements**

235 We are grateful to the chief editor and anonymous reviewers for their illuminating comments. We would also like  
236 to thank Prof. Kenneth A. Albrecht (Department of Agronomy, University of Wisconsin-Madison, WI 53706, USA)  
237 for his helpful comments on the draft of this paper. This work was supported by the project of Natural Science  
238 Fund of Jiangsu Province (BK20140413) and the Key Project of the Chinese National Programs for Fundamental  
239 Research and Development (973 Program, 2010CB950702).

## 240 **References**

- 241 Braswell, B. H., Schimel, D. S., Linder, E., and Moore, III. B.: The response of global terrestrial ecosystems to  
242 interannual temperature variability, *Science*, 278, 870-872, doi: 10.1126/science.278.5339.870, 1997.
- 243 Brevik, E. C., Cerdà A., Mataix-Solera, J., Pereg, L., Quinton, J. N., Six, J., and Van Oost, K.: The  
244 interdisciplinary nature of SOIL, *Soil*, 1, 117-129, doi:10.5194/soil-1-117-2015, 2015.
- 245 Cao, L., Xu, J., Chen, Y., Li, W., Yang, Y., Hong, Y., and Li, Z.: Understanding the dynamic coupling between  
246 vegetation cover and climatic factors in a semiarid region-a case study of Inner Mongolia, China, *Ecohydrology*,  
247 6, 917-926, doi: 10.1002/eco.1245, 2013.
- 248 Cao, M. K., and Woodward, F. I.: Dynamic responses of terrestrial ecosystem carbon cycling to global climate  
249 change, *Nature*, 393, 249-252, doi: 10.1038/30460, 1998.
- 250 Chen, Z. X., and Zhang, X. S.: Value of ecosystem services in China, *Chinese Sci. Bull.*, 45, 17-22, doi:  
251 10.1007/BF02886190, 2000.
- 252 Christenson, L. M., Mitchell, M. J., Groffman, P. M., and Lovett, G. M.: Cascading effects of climate change on  
253 forest ecosystems: biogeochemical links between trees and moose in the northeast USA, *Ecosystems*, 3, 1-16,  
254 doi: 10.1007/s10021-013-9733-5, 2014.

- 255 Conway, G. R., and Wilcox, J. C.: Fitting nonlinear models to biological data by Marquardt's algorithm, *Ecology*,  
256 3, 503-507, doi: 10.2307/1935386, 1970.
- 257 Douglas, G. G., and Geoffrey, M. H.: A technique for monitoring ecological disturbance in tall grass prairie using  
258 seasonal NDVI trajectories and a discriminate function mixture model, *Remote Sens. Environ.*, 61, 270-278,  
259 doi: 10.1016/S0034-4257(97)00043-6, 1997.
- 260 Fang, J. Y., Chen, A. P., Peng, C. H., Zhao, S. Q., and Ci, L. J.: Changes in forest biomass carbon storage in China  
261 between 1949 and 1998, *Science*, 292, 2320-2322, doi: 10.1126/science.1058629, 2001.
- 262 Gang, C., Zhou, W., Wang, Z., Chen, Y., Li, J., Chen, J., Qi, J., Odeh, I., and Groisman, P. Y.: Comparative  
263 Assessment of Grassland NPP Dynamics in Response to Climate Change in China, North America, Europe and  
264 Australia from 1981 to 2010, *J. Agron. Crop Sci.*, 1, 57-68, doi: 10.1111/jac.12088, 2015.
- 265 Gill, R. A., Kelly, R. H., Parton, W. J., Day, K. A., Jackson, R. B., Morgan, J. A., Scurlock, J. M. O., Tieszen, L. L.,  
266 Castle, J. V., Ojima, D. S., and Zhang, X. S.: Using simple environmental variables to estimate below-ground  
267 productivity in grasslands, *Global Ecol. Biogeogr.*, 1, 79-86, doi: 10.1046/j.1466-822X.2001.00267.x, 2002.
- 268 Gong, Z., Kawamura, K., Ishikawa, N., Goto, M., Wulan, T., Alateng, D., Yin, T., and Ito, Y.: Modis normalized  
269 difference vegetation index (NDVI) and vegetation phenology dynamics in the Inner Mongolia grassland, *Solid  
270 Earth*, 6, 1185-1194, doi: 10.5194/se-6-1185-2015, 2015.
- 271 Hall, D. O., Ojima, D. S., Parton, W. J., and Scurlock, J. M. O.: Response of Temperate and Tropical Grasslands to  
272 CO<sub>2</sub> and Climate Change, *J. Biogeogr.*, 22, 537-547, doi: 10.2307/2845952, 1995.
- 273 Hu, G., Liu, H., Yin, Y., and Song, Z.: The Role of Legumes in Plant Community Succession of Degraded  
274 Grasslands in Northern China, *Land Degrad. Dev.*, 27, 366-372, doi: 10.1002/ldr.2382, 2016.
- 275 Huston, M. A.: Precipitation, soils, NPP, and biodiversity: resurrection of albrecht's curve, *Ecol. Monogr.*, 3,  
276 277-296, doi: 10.1890/11-1927.1, 2012.
- 277 Keesstra, S. D., Bouma, J., Wallinga, J., Tiftonell, P., Smith, P., Cerdà A., Montanarella, L., Quinton, J. N.,

278 Pachevsky, Y., Putten, W. H., Bardgett, R. D., Moolenaar, S., Mol, G., Jansen, B., and Fresco, L. O.:The  
279 significance of soils and soil science towards realization of the United Nations Sustainable Development Goals,  
280 *Soil*, 2, 111-128, doi:10.5194/soil-2-111-2016, 2016.

281 Knapp, A. K., and Smith, M. D.: Variation among biomes in temporal dynamics of aboveground primary  
282 production, *Science*, 291, 481-484, doi: 10.1126/science.291.5503.481, 2001.

283 Lin, L., Li, Y. K., Xu, X. L., Zhang, F. W., Du, Y. G., Liu, S. L., Guo, X. W., and Cao, G. M.: Predicting  
284 parameters of degradation succession processes of Tibetan Kobresia grasslands, *Solid Earth*, 6, 1237-1246, doi:  
285 10.5194/se-6-1237-2015, 2015.

286 Lü, L., Wang, R., Liu, H., Yin, J., Xiao, J., Wang, Z., Zhao, Y., Yu, G., Han, X., and Jiang, Y.: Effect of soil  
287 coarseness on soil base cations and available micronutrients in a semi-arid sandy grassland, *Solid Earth*, 7, 1-21,  
288 doi: 10.5194/se-2016-18, 2016.

289 Lu, X., Yan, Y., Sun, J., Zhang, X., Chen, Y., Wang, X., and Cheng, G.: Short-term grazing exclusion has no  
290 impact on soil properties and nutrients of degraded alpine grassland in Tibet, China, *Solid Earth*, 6, 195-1205,  
291 doi: <http://dx.doi.org/10.5194/se-6-1195-2015>, 2015.

292 Mantgem, P. J. V., and Stephenson, N. L.: Apparent climatically induced increase of tree mortality rates in a  
293 temperate forest, *Ecol. Lett.*, 10, 909-916, doi: 10.1111/j.1461-0248.2007.01080.x, 2007.

294 Matsushita, B., and Tamura, M.: Integrating remotely sensed data with an ecosystem model to estimate net  
295 primary productivity in East Asia, *Remote Sens. Environ.*, 81, 58-66, doi:  
296 [http://dx.doi.org/10.1016/S0034-4257\(01\)00331-5](http://dx.doi.org/10.1016/S0034-4257(01)00331-5), 2002.

297 Mcguire, A. D., Joyce, L. A., Kicklighter, D. W., Melillo, J. M., Esser, G., and Vorosmarty, C. J.: Productivity  
298 response of climax temperate forests to elevated temperature and carbon dioxide: a North American comparison  
299 between two global models, *Climatic Change*, 4, 287-310, doi: 10.1007/BF01091852, 1993.

300 Mohamed, M. A., Babiker, I. S., Chen, Z. M., Ikeda, K., Ohta, K., and Kato, K.: The role of climate variability in

301 the inter-annual variation of terrestrial net primary production (NPP), *Sci. Total Environ.*, 332, 123-137, doi:  
302 10.1016/j.scitotenv.2004.03.009, 2004.

303 Mosier, A. R., Schimel, D., Valentine, D., Bronson, K., and Parton, W.: Methane and nitrous oxide fluxes in native,  
304 fertilized and cultivated grasslands, *Nature*, 350, 330-332, doi: 10.1038/350330a0, 1991.

305 Nemani, R. R., Keeling, C. D., Hashimoto, H., Jolly, W. M., Piper, S. C., Tucker, C. J., Myneni, R. B., and  
306 Running, S. W.: Climate-driven increases in global terrestrial net primary production from 1982 to 1999,  
307 *Science*, 300, 1560-1563, doi: 10.1126/science.1082750, 2003.

308 Ni, J.: Effects of climate change on carbon storage in boreal forests of china: a local perspective, *Climatic Change*,  
309 1-2, 61-75, doi: 10.1023/A:1020291220673, 2002.

310 Pablo, M., Thomas, H., David, P. R., Benjamin, S., and Martin, T. S.: Changes in European ecosystem  
311 productivity and carbon balance driven by regional climate model output, *Global Change Biol.*, 1, 108-122, doi:  
312 <http://dx.doi.org/10.1111/j.1365-2486.2006.01289.x>, 2007.

313 Parton, W. J., Scurlock, J. M. O., Ojima, D. S., Schimel, D. S., and Hall, D. O.: Impact of climate change on  
314 grassland production and soil carbon worldwide, *Global Change Biol.*, 1, 13-22, doi:  
315 10.1111/j.1365-2486.1995.tb00002.x, 1995.

316 Pereira, P., Cerdà A., Lopez, A. J., Zavala, L. M., Mataix-Solera, J., Arcenegui, V., Misiune, I., Keesstra, S., and  
317 Novara, A.: Short-term vegetation recovery after a grassland fire in Lithuania: the effects of fire severity, slope  
318 position and aspect, *Land Degrad. Dev.*, 27, 1523-1534, doi:10.1002/ldr.2498, 2016.

319 Picard, G., Quegan, S. N., Lomas, M. R., Toan, T. L., and Woodward, F. I.: Bud-burst modelling in Siberia and its  
320 impact on quantifying the carbon budget, *Global Change Biol.*, 12, 2164-2176, doi:  
321 10.1111/j.1365-2486.2005.01055.x, 2005.

322 Poeplau, C., Marstorp, H., Thored, K., and Käterer, T.: Effect of grassland cutting frequency on soil carbon  
323 storage-a case study on public lawns in three Swedish cities, *Soil*, 2, 175-184, doi: 10.5194/soil-2-175-2016,

324 2016.

325 Raich, J. W., Rastetter, E. B., Melillo, J. M., Kicklighter, D. W., and Steudler, P. B. J.: Potential net primary  
326 productivity in South America: application of a global model, *Ecol. Appl.*, 4, 399-429, doi: 10.2307/1941899,  
327 1991.

328 Ren, W., Tian, H., Tao, B., Chappelka, A., Sun, G., Lu, C., Liu, M., Chen, G., and Xu, X.: Impacts of tropospheric  
329 ozone and climate change on net primary productivity and net carbon exchange of china's forest ecosystems,  
330 *Global Ecol. Biogeogr.*, 3, 391-406, doi: 10.1111/j.1466-8238.2010.00606.x, 2011.

331 Richardson, A. D., Anderson, R. S., Arain, M. A., Barr, A. G., Bohrer, G., and Chen, G.: Terrestrial biosphere  
332 models need better representation of vegetation phenology: results from the north American carbon program  
333 site synthesis, *Global Change Biol.*, 2, 566-584, doi: <http://dx.doi.org/10.1111/j.1365-2486.2011.02562.x>, 2012.

334 Ronnenberg, K., and Wesche, K.: Effects of fertilization and irrigation on productivity, plant nutrient contents and  
335 soil nutrients in Southern Mongolia, *Plant Soil*, 1-2, 239-251, doi: 10.1007/s11104-010-0409-z, 2010.

336 Roosendaal, D., Stewart, C. E., Denef, K., Follett, R. F., Pruessner, E., Comas, L. H., Varvel, G. E., Saathoff, A.,  
337 Palmer, N., Sarath, G., Jin, V. L., Schmer, M., and Soundararajan, M.: Switchgrass ecotypes alter microbial  
338 contribution to deep-soil C, *Soil*, 2, 185-197, doi:10.5194/soil-2-185-2016, 2016.

339 Sala, O. E., Chapin, III, F. S., Armesto, J. J., Berlow, E., Bloomfield, J., Dirzo, R., Huber-Sanwald, E., Huenneke,  
340 L. F., Jackson, R. B., Kinzig, A., Leemans, R., Lodge, D. M., Mooney, H. A., Oesterheld, M., Poff, N. L., Syke,  
341 M. T., Walker, B. H., Walker, M., and Wall, D. H.: Global biodiversity scenarios for the year 2100, *Science*, 287,  
342 1770-1774, doi: 10.1126/science.287.5459.1770, 2000.

343 Shaw, E. A., Denef, K., Tomasel, C. M. D., Cotrufo, M. F., and Wall, D. H.: Fire affects root decomposition, soil  
344 food web structure, and carbon flow in tallgrass prairie, *Soil*, 2, 199-210, doi: 10.5194/soil-2-199-2016, 2016.

345 Sun, Z. G., Long, X. H., Sun, C. M., Zhou, W., Ju, W. M., and Li, J. L.: Evaluation of net primary productivity and  
346 its spatial and temporal patterns in Southern China's grasslands, *Rangeland J.*, 3, 331-338, doi:

347 <http://dx.doi.org/10.1071/RJ12061>, 2013.

348 Sun, Z. G., Sun, C. M., Zhou, W., Ju, W. M., and Li, J. L.: Classification and Net Primary Productivity of the  
349 Southern China's Grasslands Ecosystem Based on Improved Comprehensive and Sequential Classification  
350 System (CSCS) Approach, *J. Integr. Agr.*, 4, 893-903, doi: 10.1016/S2095-3119(13)60415-3, 2014.

351 Wunder, J., Fowler, A. M., Cook, E. R., Pirie, M., and McCloskey, S. P. J.: On the influence of tree size on the  
352 climate–growth relationship of New Zealand Kauri (*Agathis australis*): insights from annual, monthly and daily  
353 growth patterns, *Trees*, 4, 937-948, doi: 10.1007/s00468-013-0846-4, 2013.

354 Xu, X., Niu, S. L., Sherry, R. A., Zhou, X. H., Zhou, J. Z., and Luo, Y. Q.: Interannual variability in responses of  
355 belowground net primary productivity (NPP) and NPP partitioning to long-term warming and clipping in a tall  
356 grass prairie, *Global Change Biol.*, 18, 1648-1656, doi: 10.1111/j.1365-2486.2012.02651.x, 2012.

357 Yu, D., Zhu, W., and Pan, Y.: The role of atmospheric circulation system playing in coupling relationship between  
358 spring NPP and precipitation in East Asia area, *Environ. Monit. Assess.*, 1-3, 135-143, doi:  
359 10.1007/s10661-007-0023-6, 2008.

360 Zhang, G. G., Kang, Y. M., Han, G. D., and Sakurai, K.: Effect of climate change over the past half century on the  
361 distribution, extent and NPP of ecosystems of Inner Mongolia, *Global Changesss Biol.*, 17, 377-389, doi:  
362 10.1111/j.1365-2486.2010.02237.x, 2011.

363 Zhou, W., Gang, C., Zhou, L., Chen, Y., Li, J., Ju, W., and Odeh, I.: Dynamic of grassland vegetation degradation  
364 and its quantitative assessment in the northwest China, *Acta Oecol.*, 55, 86-96, doi:  
365 <http://dx.doi.org/10.1016/j.actao.2013.12.006>, 2014.

366

367

368

369



370 **Fig. 1** Study area and meteorological stations in Southern China (the black boundary-lines indicate the provincial  
371 boundary; the red dots represent the locations of the meteorological stations).

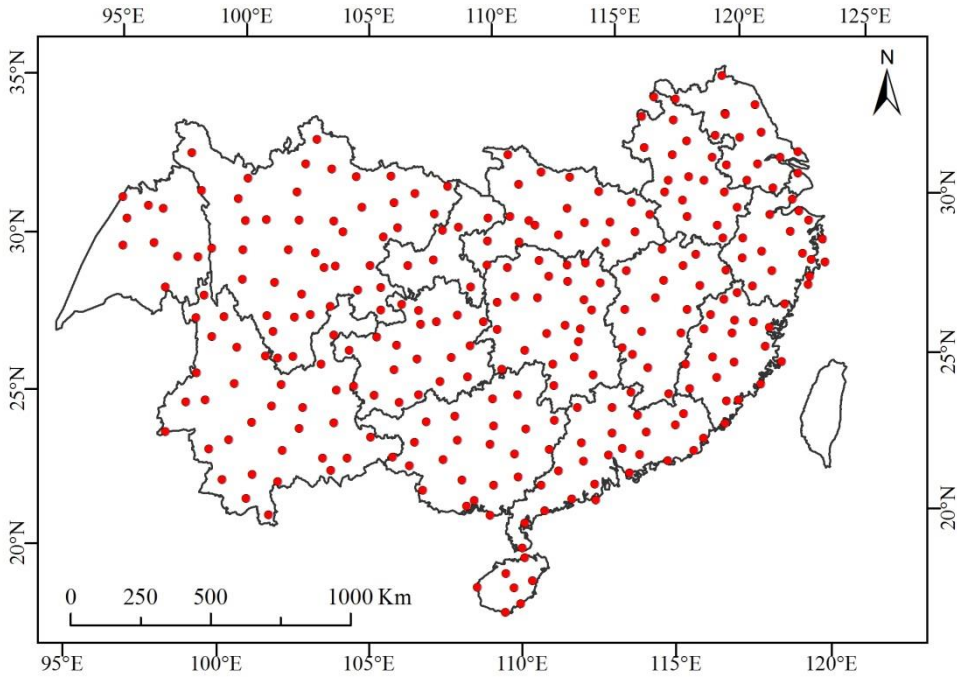

372

373

374

375 **Fig. 2** The distribution map of grasslands of Southern China (the black boundary-lines indicate the provincial  
376 boundary; the green zone represents the grassland area, and the colorless region represents the non-grassland of  
377 the study area).

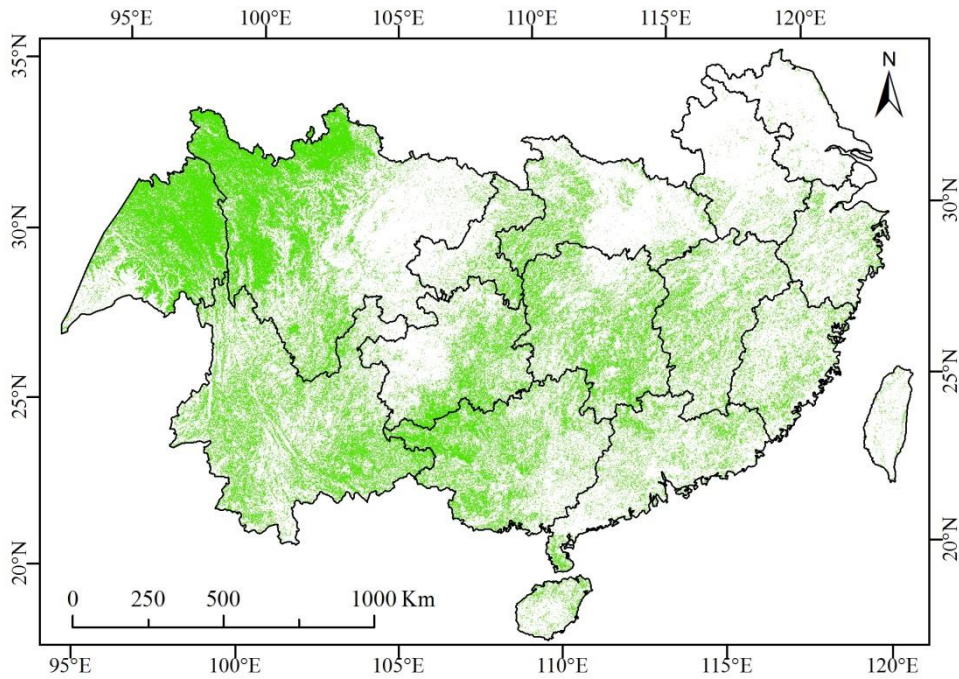

378

379

380

381

382

383 **Fig. 3** Comparison between simulated and observed grassland NPP (net primary productivity) of Southern China.

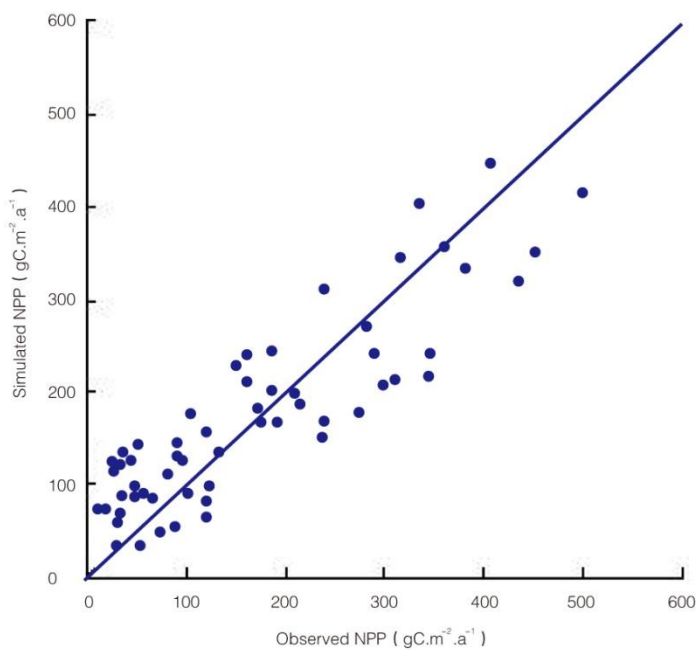

384

385

386

387

388

389

390

391

392

393

394

395

396

397

398

399

400 **Fig. 4** Spatial characteristics of grassland NPP of Southern China from 2003 to 2014.

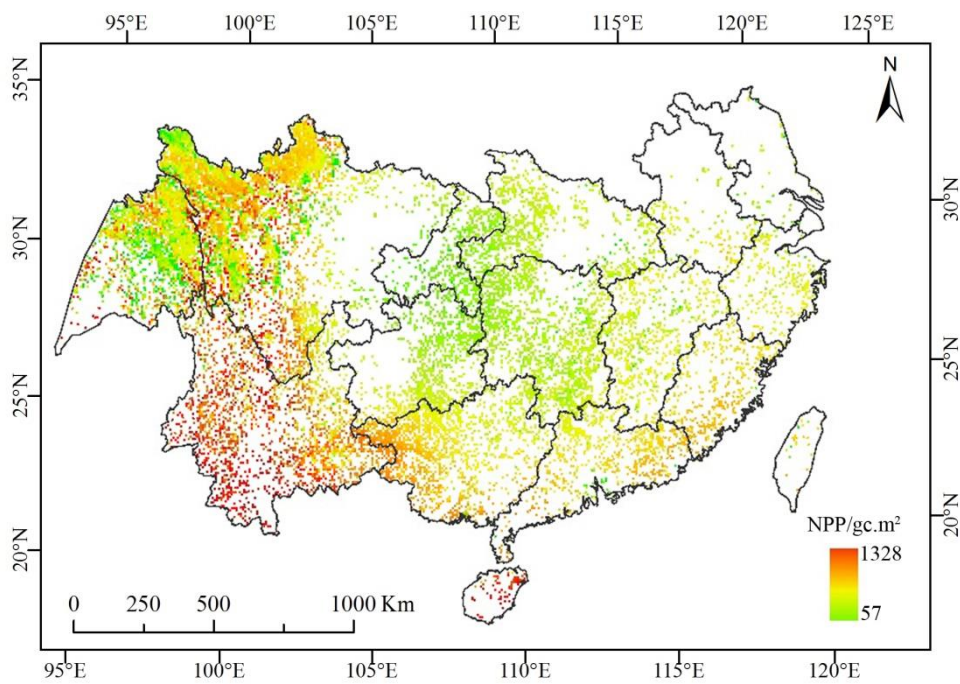

401

402

403

404

405

406

407 **Fig. 5** The inter-annual variation of grassland NPP of Southern China from 2003 to 2014.

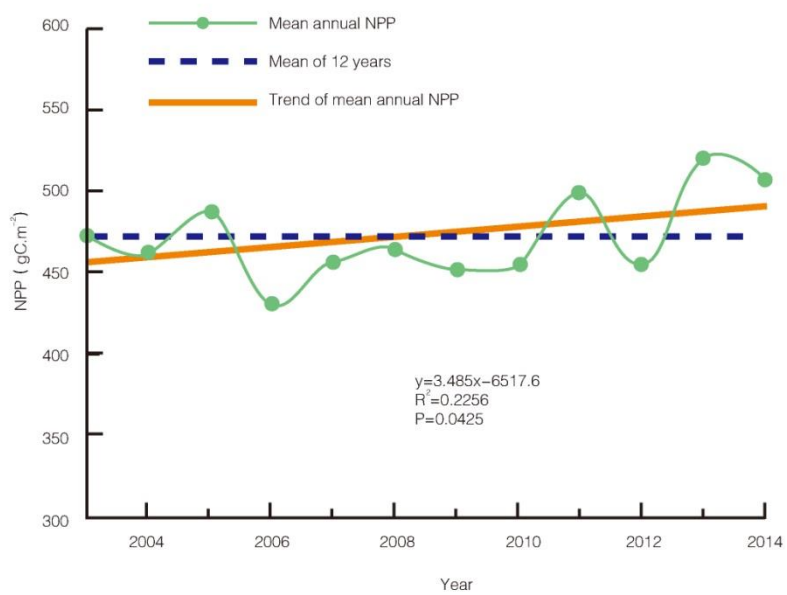

408
